# Supplementary material for: Integrity, use and care of long-lasting insecticidal nets in Kirinyaga County, Kenya
Source: Springer Nature journal article supplement (doi:10.1186/s12889-021-10882-x), 2021-05-03

Sample Information

Analyzed by : Admin  
 Analyzed : 6/26/2019 1:25:45 AM  
 Sample Type : Unknown  
 Level # : 1  
 Sample Name : 190625\_mary\_24  
 Sample ID : STD-0013  
 IS Amount : [1]=1  
 Sample Amount : 1  
 Dilution Factor : 1  
 Vial # : 13  
 Injection Volume : 1.00  
 Data File : C:\GCMSsolution\Data\Project1\Martin\Mary\_KEMRI\_1\190625\_mary\_24.qgd  
 Org Data File : C:\GCMSsolution\Data\Project1\Martin\Mary\_KEMRI\_1\190625\_mary\_24.qgd  
 Method File : C:\GCMSsolution\Data\Project1\Martin\Mary\_KEMRI\_1\Pesticides\_mary\_quant.qgm  
 Org Method File : C:\GCMSsolution\Data\Project1\Martin\Pesticides\_mary.qgm  
 Report File :  
 Tuning File : C:\GCMSsolution\System\Tune1\Default.qgt  
 Modified by : Admin  
 Modified : 9/27/2019 1:49:24 PM

Quantitative Result Table

| ID# | Name         | Conc.     | Conc.Unit | R.Time | m/z    | Area | Height |
|-----|--------------|-----------|-----------|--------|--------|------|--------|
| 1   | permethrin   | 257.592   | ppb       | 24.673 | 183.00 | 2545 | 508    |
| 2   | cypermethrin | N.D.(Ref) | ppb       | -      | 163.00 | ---  | ---    |

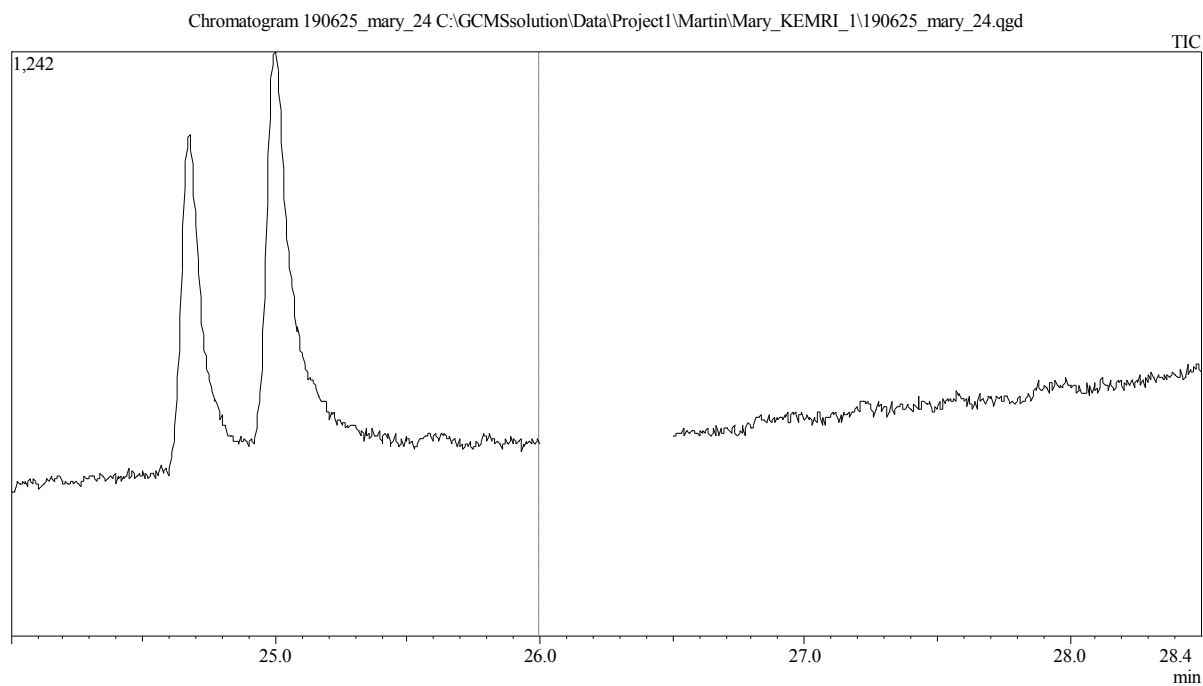

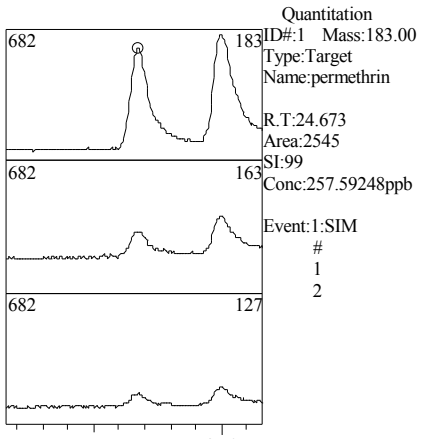

Event:1:SIM

| # | m/z    | Intensity | Ratio |
|---|--------|-----------|-------|
| 1 | 163.00 | 117       | 24.48 |
| 2 | 127.00 | 54        | 11.30 |

Calibration

ID#1 Mass:183.00 Name:permethrin  
 $f(x)=14.892177*x-1291.112903$   
 $rr1=0.977152$   $rr2=0.954827$   
 MeanRF:11.49 RFSD:1.96 RFRSD:17.04  
 CurveType:Least Square Method  
 ZeroThrough:Not Through  
 WeightedRegression:None  
 External Standard

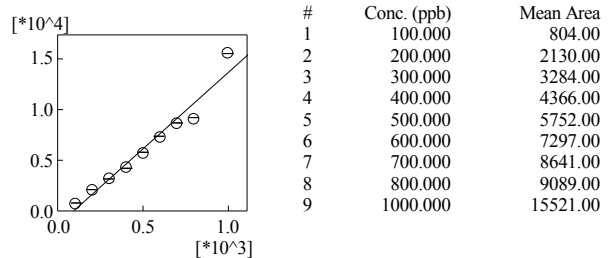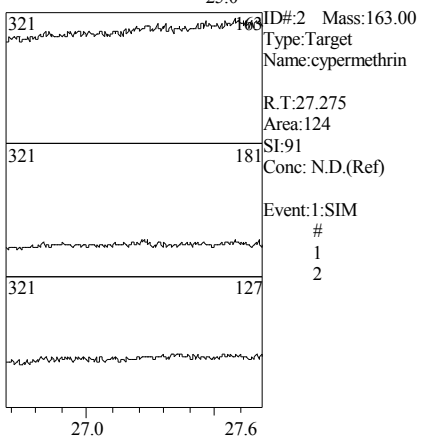

Event:1:SIM

| # | m/z    | Intensity | Ratio |
|---|--------|-----------|-------|
| 1 | 181.00 | 3         | 25.00 |
| 2 | 127.00 | 3         | 25.00 |

ID#2 Mass:163.00 Name:cypermethrin  
 $f(x)=11.304177*x-1258.912903$   
 $rr1=0.981354$   $rr2=0.963056$   
 MeanRF:7.80 RFSD:2.28 RFRSD:29.21  
 CurveType:Least Square Method  
 ZeroThrough:Not Through  
 WeightedRegression:None  
 External Standard

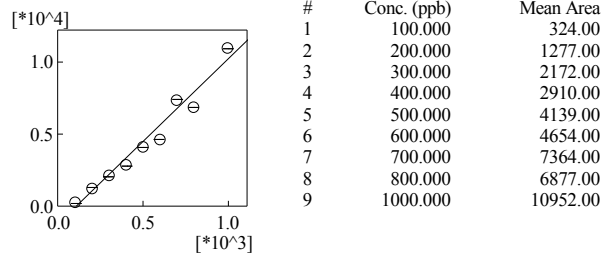

Supplement: MOESM11 [file 19127046]
