# Supplementary material for: Integrity, use and care of long-lasting insecticidal nets in Kirinyaga County, Kenya
Source: Springer Nature journal article supplement (doi:10.1186/s12889-021-10882-x), 2021-05-03
Supplement: MOESM7 [file 19127046]

Sample Information

Analyzed by : Admin  
Analyzed : 6/26/2019 4:38:26 PM  
Sample Type : Unknown  
Level # : 1  
Sample Name : 190625\_mary\_BL5  
Sample ID : STD-0036  
IS Amount : [1]=1  
Sample Amount : 1  
Dilution Factor : 1  
Vial # : 36  
Injection Volume : 1.00  
Data File : C:\GCMSsolution\Data\Project1\Martin\Mary\_KEMRI\_1\190625\_mary\_BL5.qgd  
Org Data File : C:\GCMSsolution\Data\Project1\Martin\Mary\_KEMRI\_1\190625\_mary\_BL5.qgd  
Method File : C:\GCMSsolution\Data\Project1\Martin\Mary\_KEMRI\_1\Pesticides\_mary\_quant.qgm  
Org Method File : C:\GCMSsolution\Data\Project1\Martin\Pesticides\_mary.qgm  
Report File :  
Tuning File : C:\GCMSsolution\System\Tune1\Default.qgt  
Modified by : Admin  
Modified : 8/8/2019 12:17:43 PM

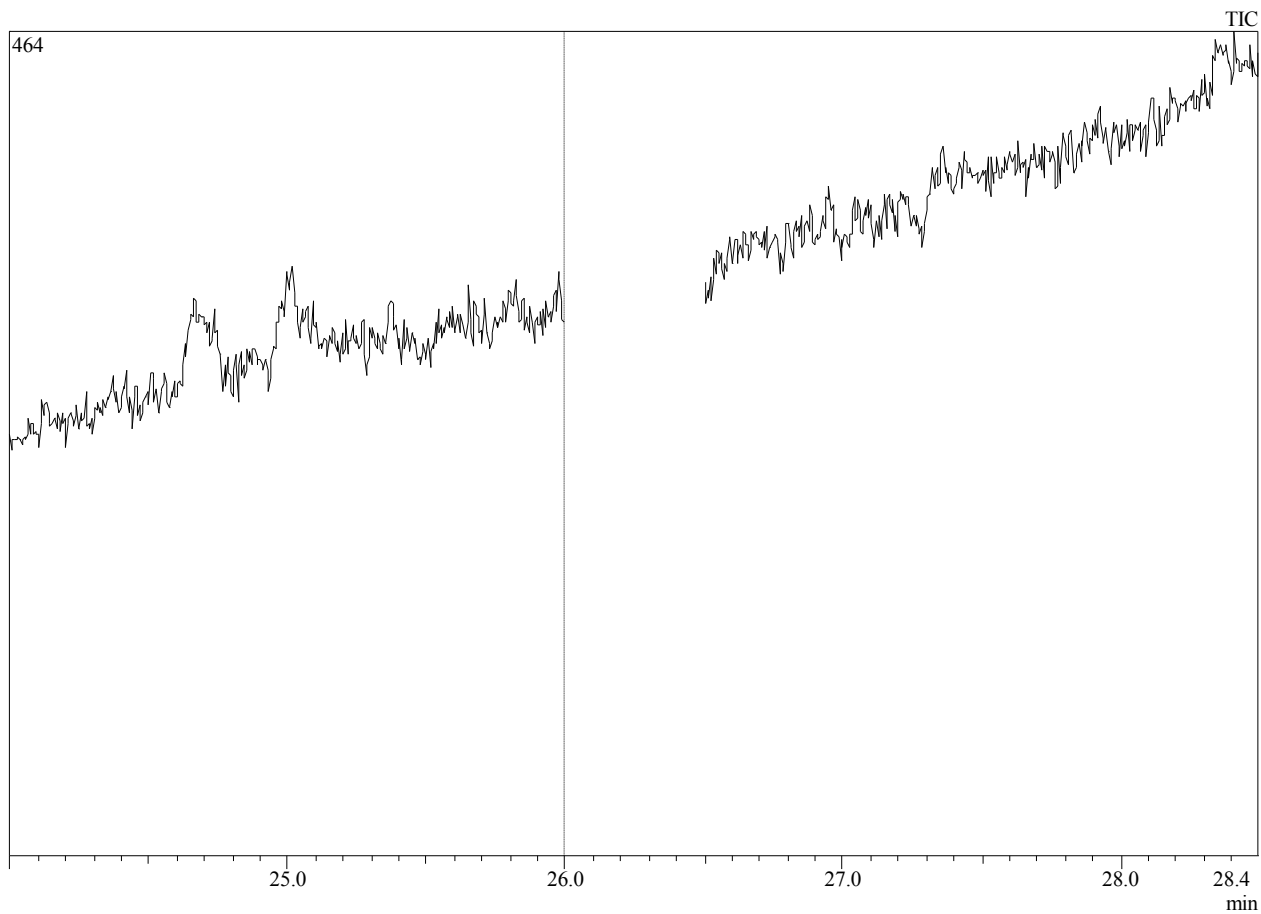

Library

No peaks found
