# Supplementary material for: Integrity, use and care of long-lasting insecticidal nets in Kirinyaga County, Kenya
Source: Springer Nature journal article supplement (doi:10.1186/s12889-021-10882-x), 2021-05-03

Quantitative Result Table

| ID# | R.Time | m/z    | Area | Height | Conc.      | Name         |
|-----|--------|--------|------|--------|------------|--------------|
| 1   | 24.65  | 183.00 | 1352 | 303    | 143.27 ppb | permethrin   |
| 2   | 27.17  | 163.00 | 150  | 47     | 79.86 ppb  | cypermethrin |

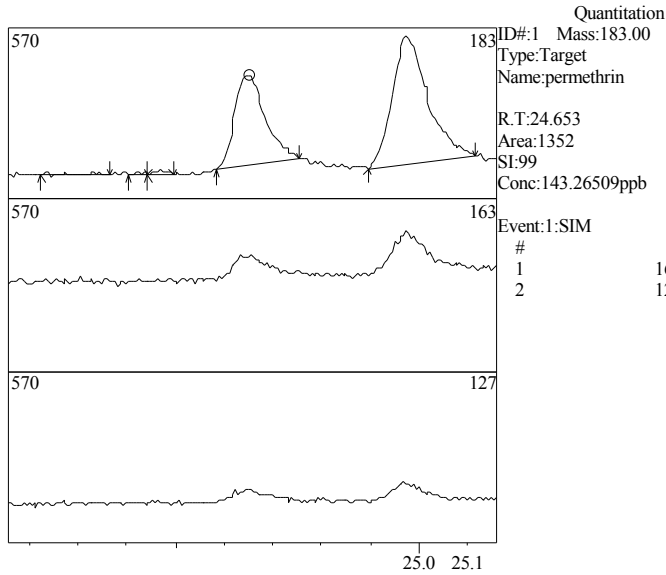

Event: 1: SIM

| # | m/z    | Intensity | Ratio |
|---|--------|-----------|-------|
| 1 | 163.00 | 70        | 23.10 |
| 2 | 127.00 | 38        | 12.54 |

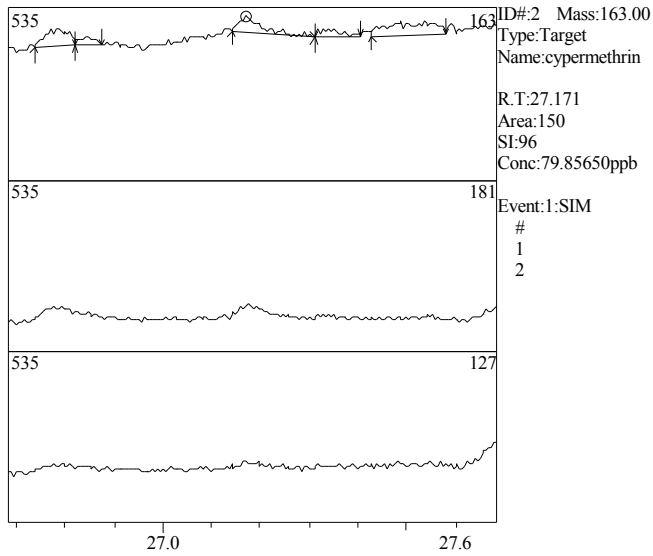

Event: 1: SIM

| # | m/z    | Intensity | Ratio |
|---|--------|-----------|-------|
| 1 | 181.00 | 25        | 64.10 |
| 2 | 127.00 | 7         | 17.95 |

Chromatogram 13082019\_mary\_500ppb\_rep C:\GCMSsolution\Data\Project1\13082019\_mary\_500ppb\_rep001.qgd

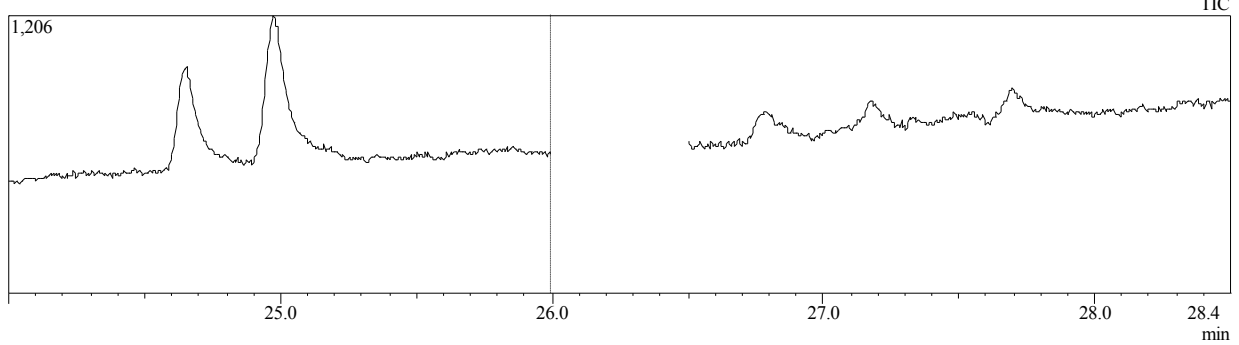

Supplement: MOESM8 [file 19127046]
