# Supplementary material for: Integrity, use and care of long-lasting insecticidal nets in Kirinyaga County, Kenya
Source: Springer Nature journal article supplement (doi:10.1186/s12889-021-10882-x), 2021-05-03

Sample Information

Analyzed by : Admin  
 Analyzed : 8/19/2019 5:07:36 PM  
 Sample Type : Unknown  
 Level # : 1  
 Sample Name : 19082019\_mary\_rep  
 Sample ID : STD-0002  
 IS Amount : [1]=1  
 Sample Amount : 1  
 Dilution Factor : 1  
 Vial # : 1  
 Injection Volume : 1.00  
 Data File : C:\GCMSsolution\Data\Project1\19082019\_mary\_rep001.qgd  
 Org Data File : C:\GCMSsolution\Data\Project1\19082019\_mary\_rep001.qgd  
 Method File : C:\GCMSsolution\Data\Project1\Martin\Mary\_KEMRI\_1\Pesticides\_mary\_quant.qgm  
 Org Method File : C:\GCMSsolution\Data\Project1\Martin\Pesticides\_mary.qgm  
 Report File :  
 Tuning File : C:\GCMSsolution\System\Tune1\Default.qgt  
 Modified by : Admin  
 Modified : 9/27/2019 3:48:25 PM

Quantitative Result Table

| ID# | Name         | Conc.   | Conc.Unit | R.Time | m/z    | Area | Height |
|-----|--------------|---------|-----------|--------|--------|------|--------|
| 1   | permethrin   | 443.176 | ppb       | 24.652 | 183.00 | 5141 | 1202   |
| 2   | cypermethrin | 135.412 | ppb       | 27.185 | 163.00 | 650  | 158    |

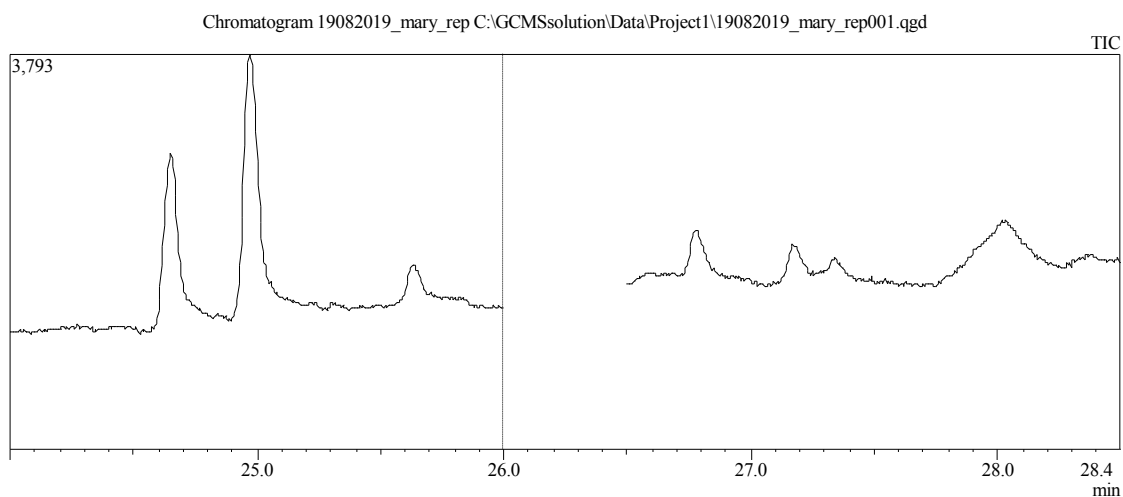

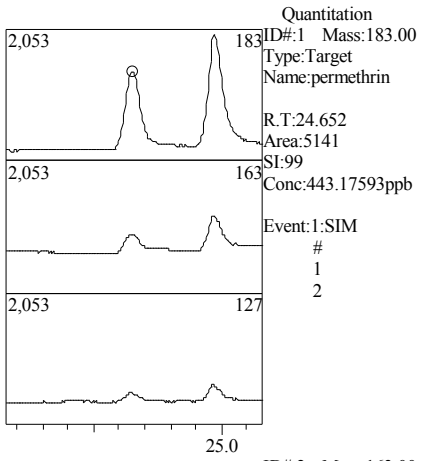

Calibration

ID#1 Mass:183.00 Name:permethrin  
 $f(x)=12.633755*x-457.976103$   
 $rr1=0.999127$   $rr2=0.998255$   
 MeanRF:10.94 RFSD:1.43 RFRSD:13.08  
 CurveType:Least Square Method  
 ZeroThrough:Not Through  
 WeightedRegression:1/C2  
 External Standard

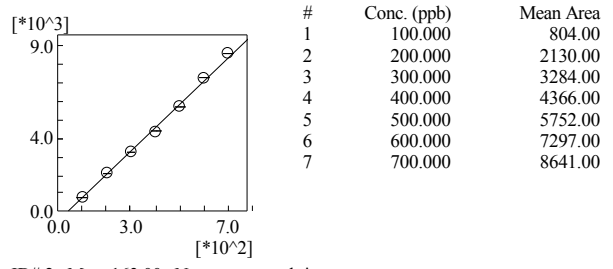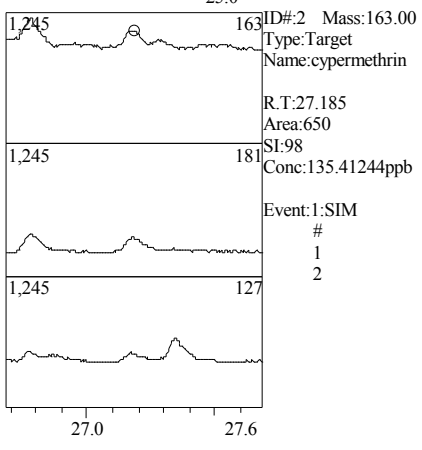

Calibration

ID#2 Mass:163.00 Name:cypermethrin  
 $f(x)=8.999937*x-568.703460$   
 $rr1=0.999000$   $rr2=0.998001$   
 MeanRF:6.75 RFSD:1.86 RFRSD:27.63  
 CurveType:Least Square Method  
 ZeroThrough:Not Through  
 WeightedRegression:1/C2  
 External Standard

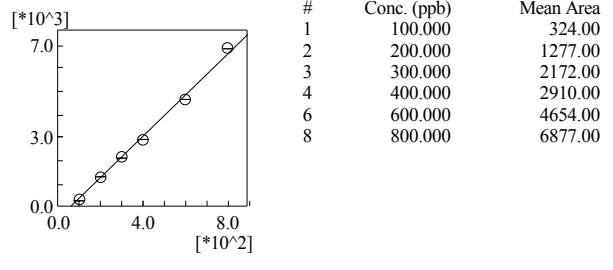

Supplement: MOESM9 [file 19127046]
