# Supplementary material for: Integrity, use and care of long-lasting insecticidal nets in Kirinyaga County, Kenya
Source: Springer Nature journal article supplement (doi:10.1186/s12889-021-10882-x), 2021-05-03

Quantitative Result Table

| ID# | R. Time | m/z    | Area | Height | Conc.      | Name         |
|-----|---------|--------|------|--------|------------|--------------|
| 1   | 24.64   | 183.00 | 1672 | 398    | 168.59 ppb | permethrin   |
| 2   | 27.16   | 163.00 | 438  | 79     | 111.86 ppb | cypermethrin |

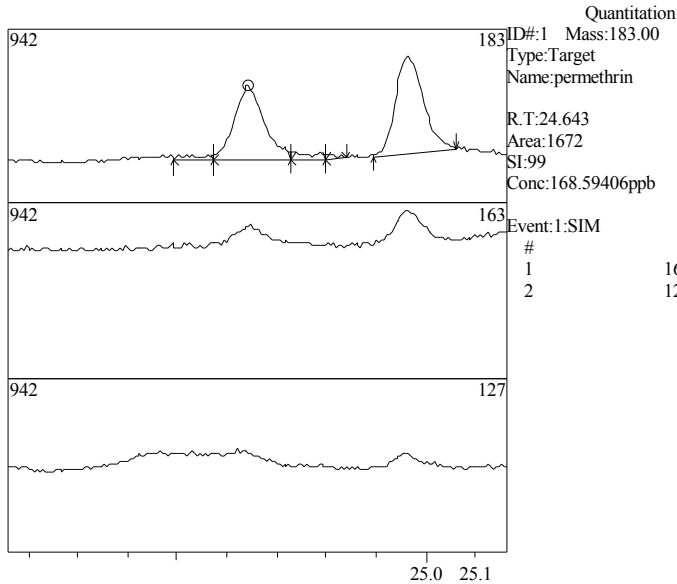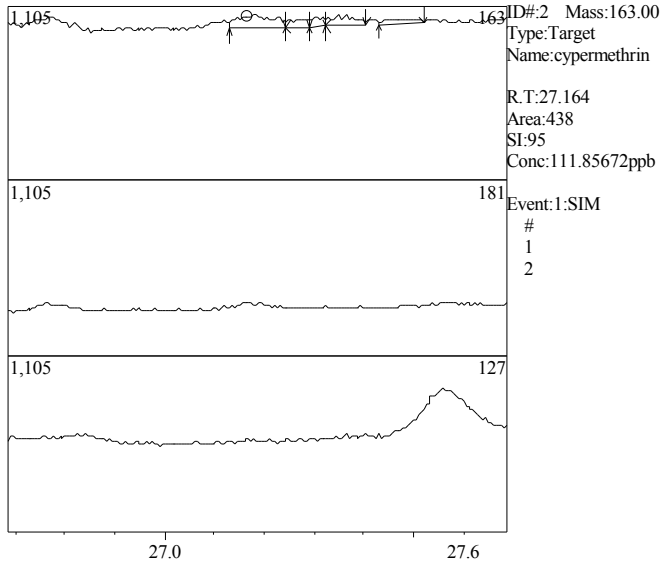

Chromatogram 16082019\_mary\_rep C:\GCMSsolution\Data\Project1\16082019\_mary\_rep001.qgd

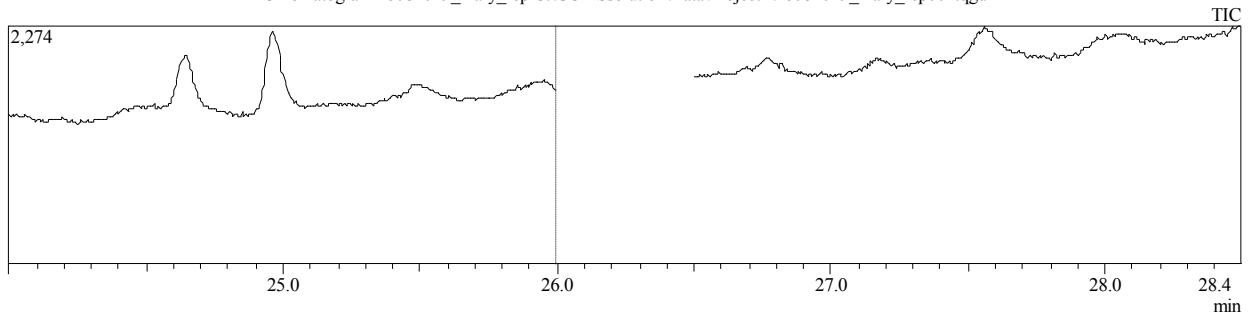

Supplement: MOESM10 [file 19127046]
